# Supplementary material
Source: Springer Nature journal article supplement (https://www.springermedizin.de/resource/supplementary/12961_2010_195_MOESM1_ESM.pdf/9571630)
Supplement: MOESM1 [file 9571630]

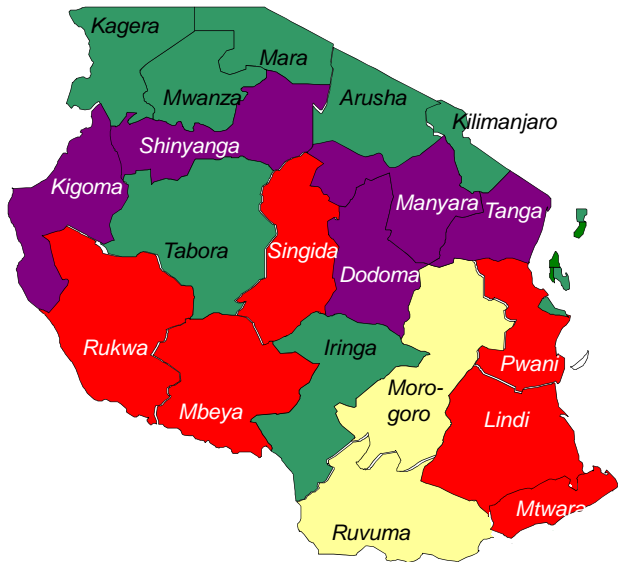

-  Regions with subsidized ACT delivery through ADDO pilot program
-  Regions with ADDOs but no subsidized ACT delivery yet
-  Current ADDO expansion efforts
-  Region sensitization completed, mobilized their own resources but no scale up funding yet
